# Supplementary figures and images for: Genetic neuropathology of obsessive psychiatric syndromes
Source: PubMed Central journal article supplement — Transl Psychiatry. 2014 Sep 2;4(9):e432–. doi: 10.1038/tp.2014.68 (PMC4203002; doi:10.1038/tp.2014.68), 2014-09-02

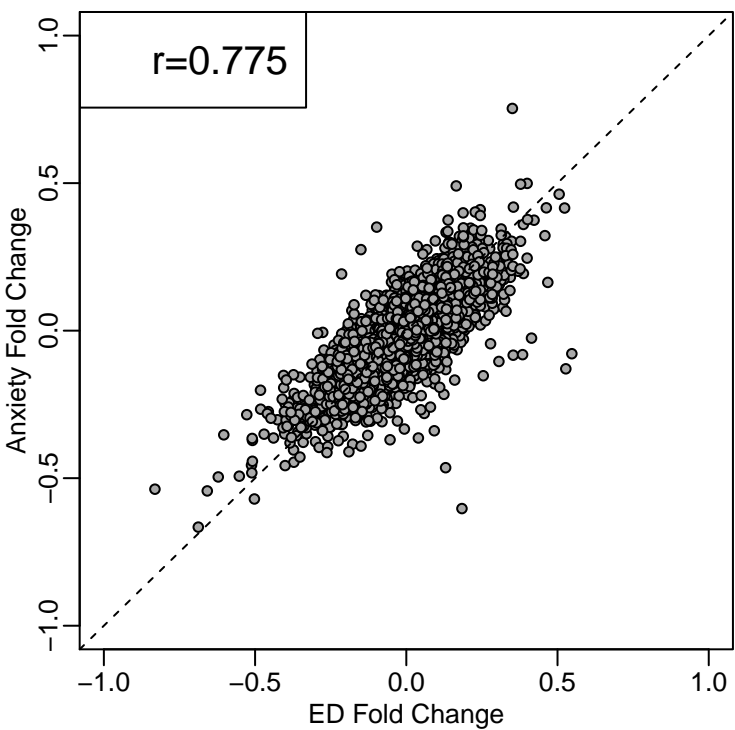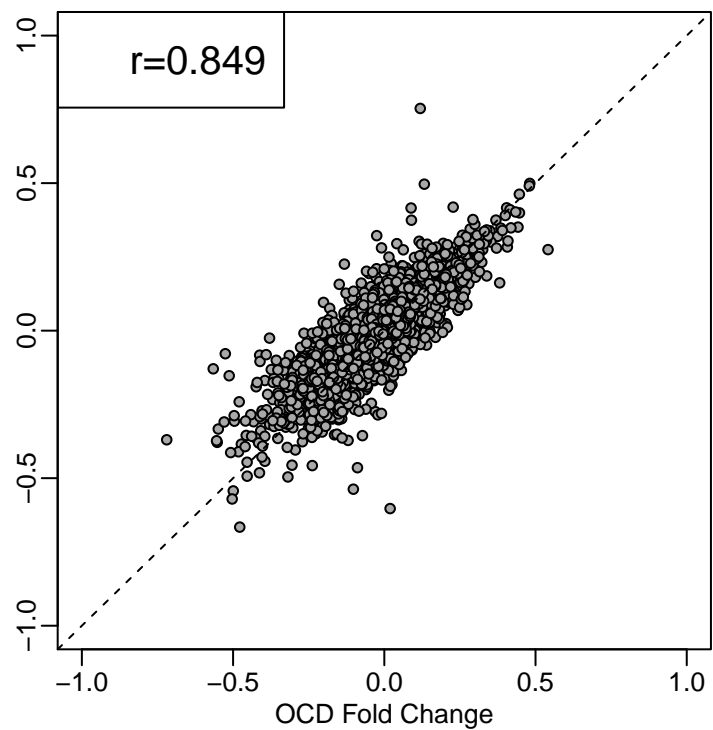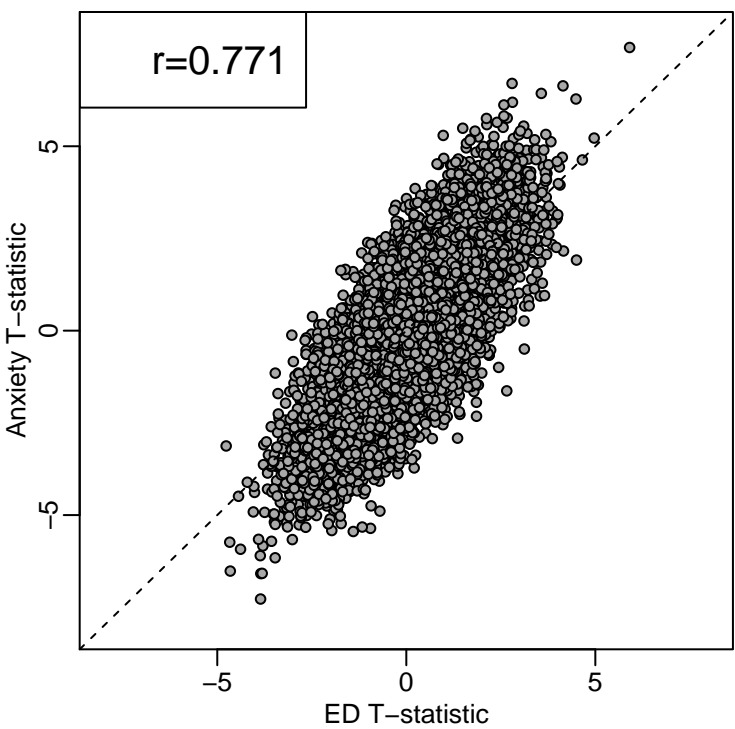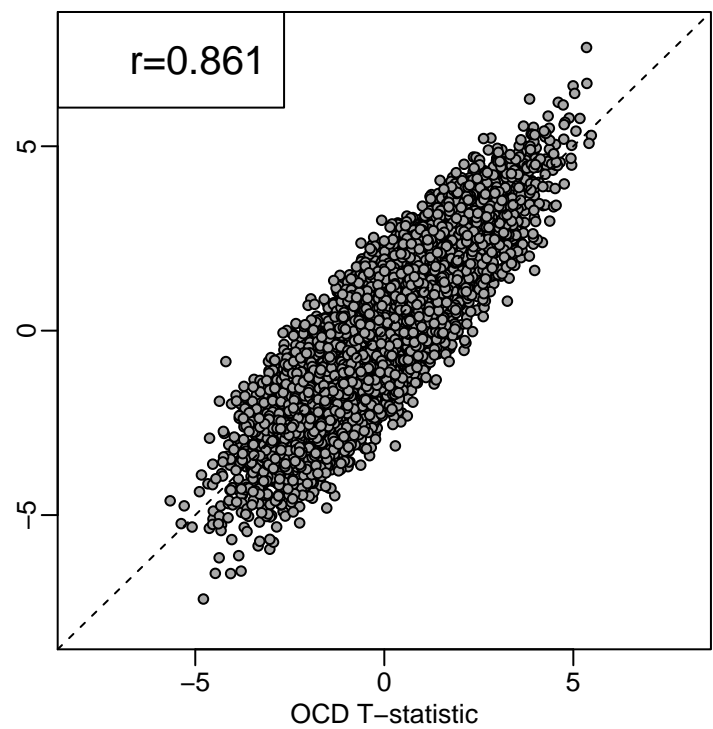

Supplement: tp201468x2.pdf [file tp201468x2.pdf]

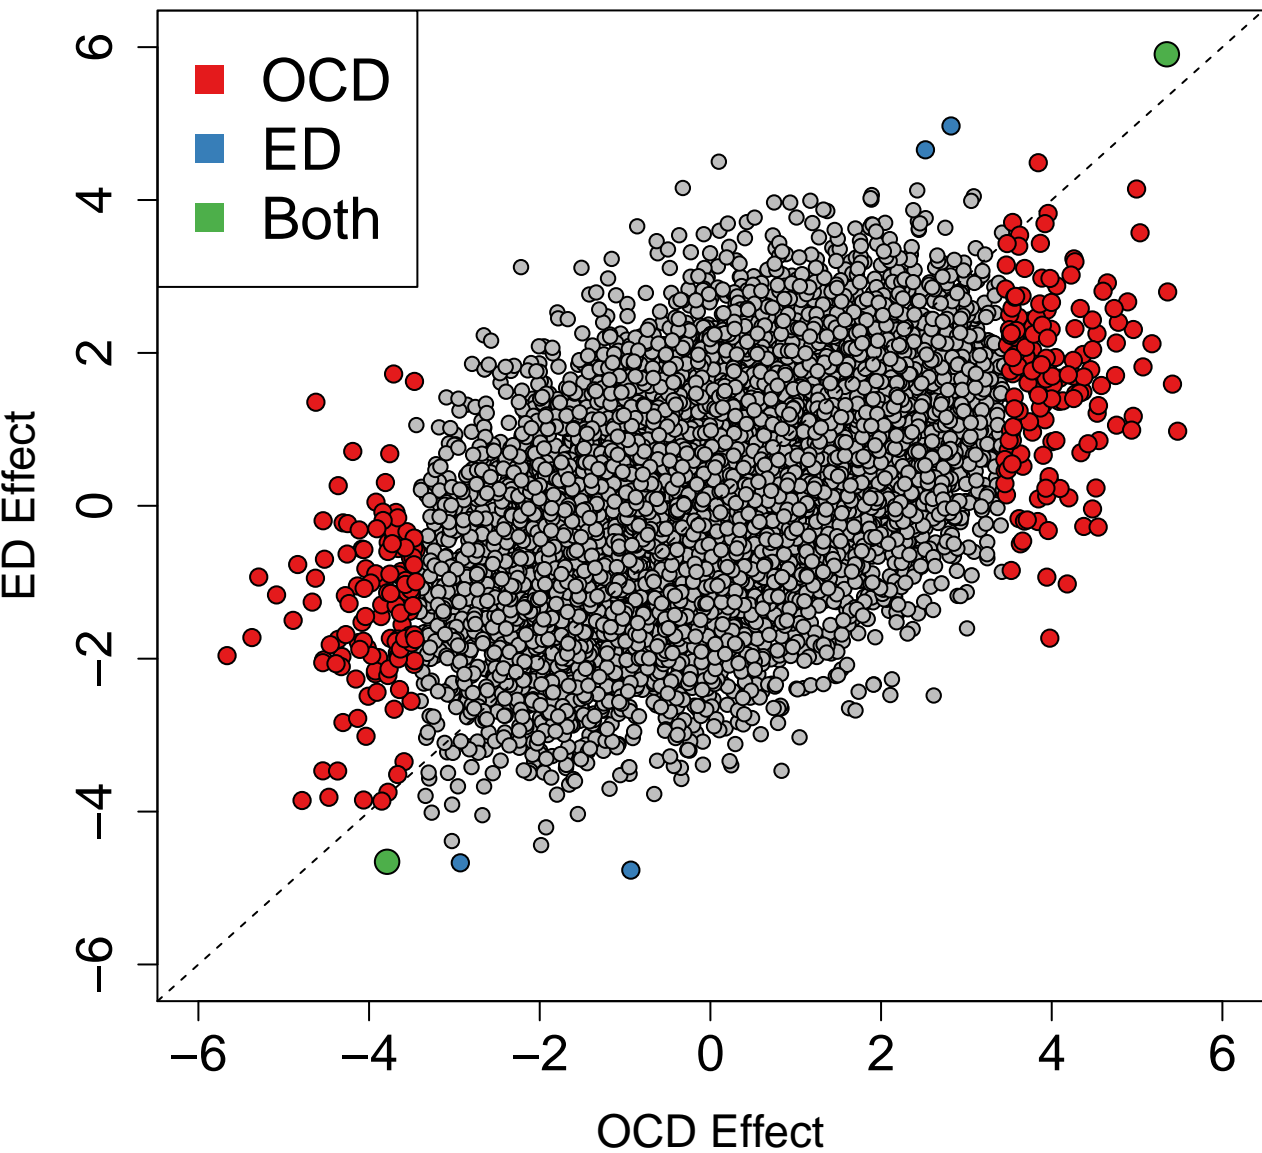

Supplement: tp201468x3.pdf [file tp201468x3.pdf]

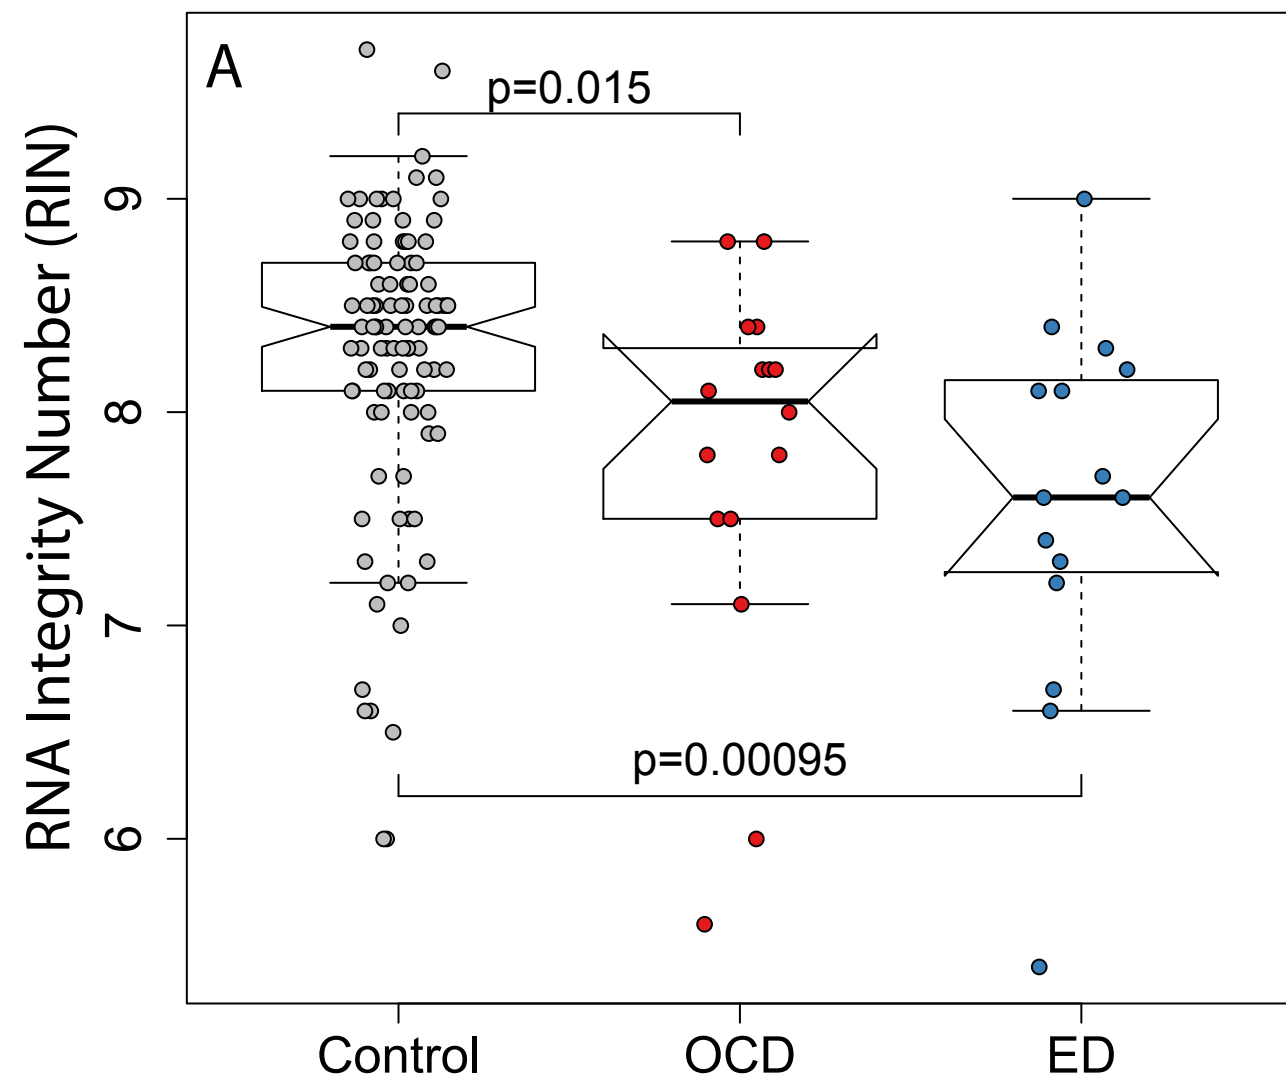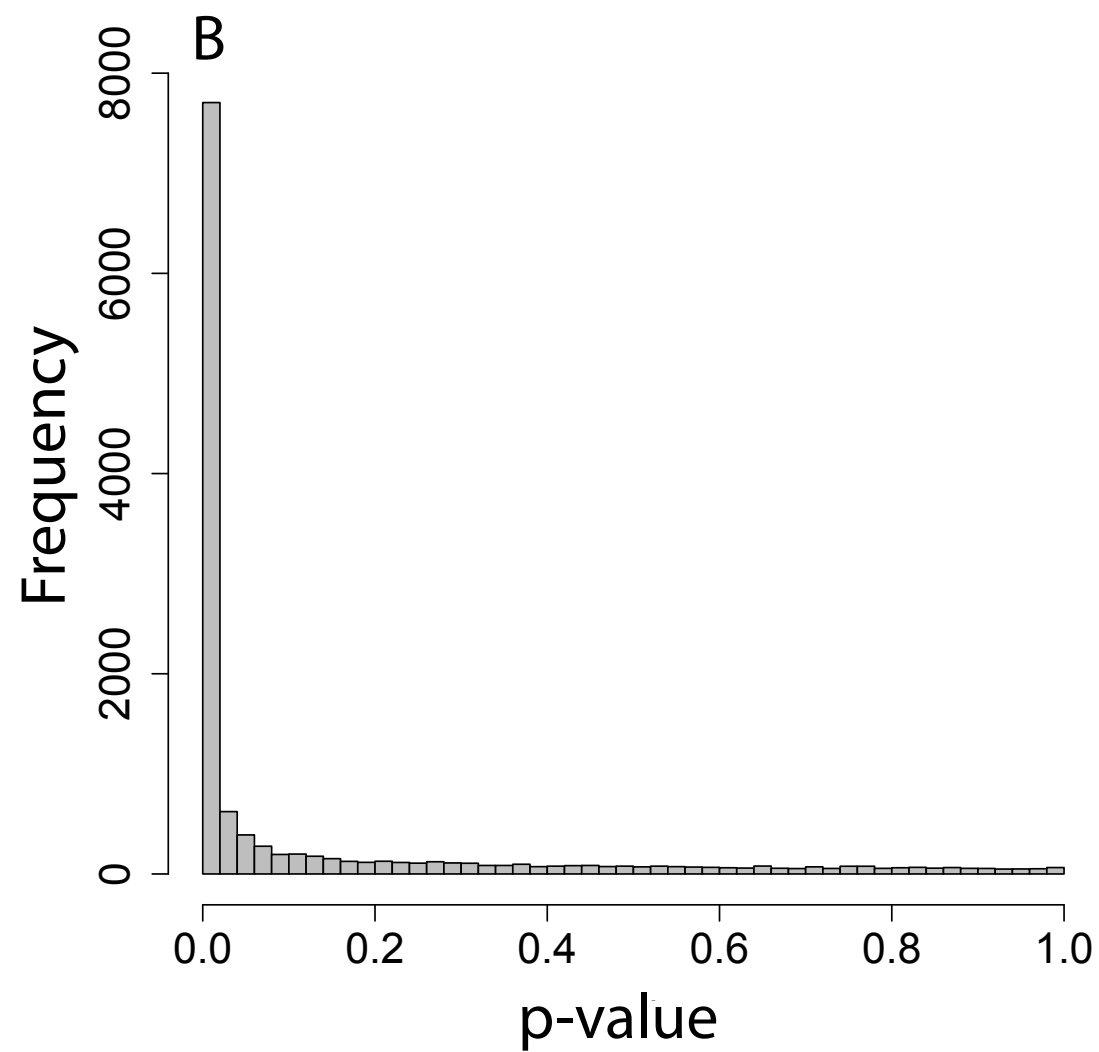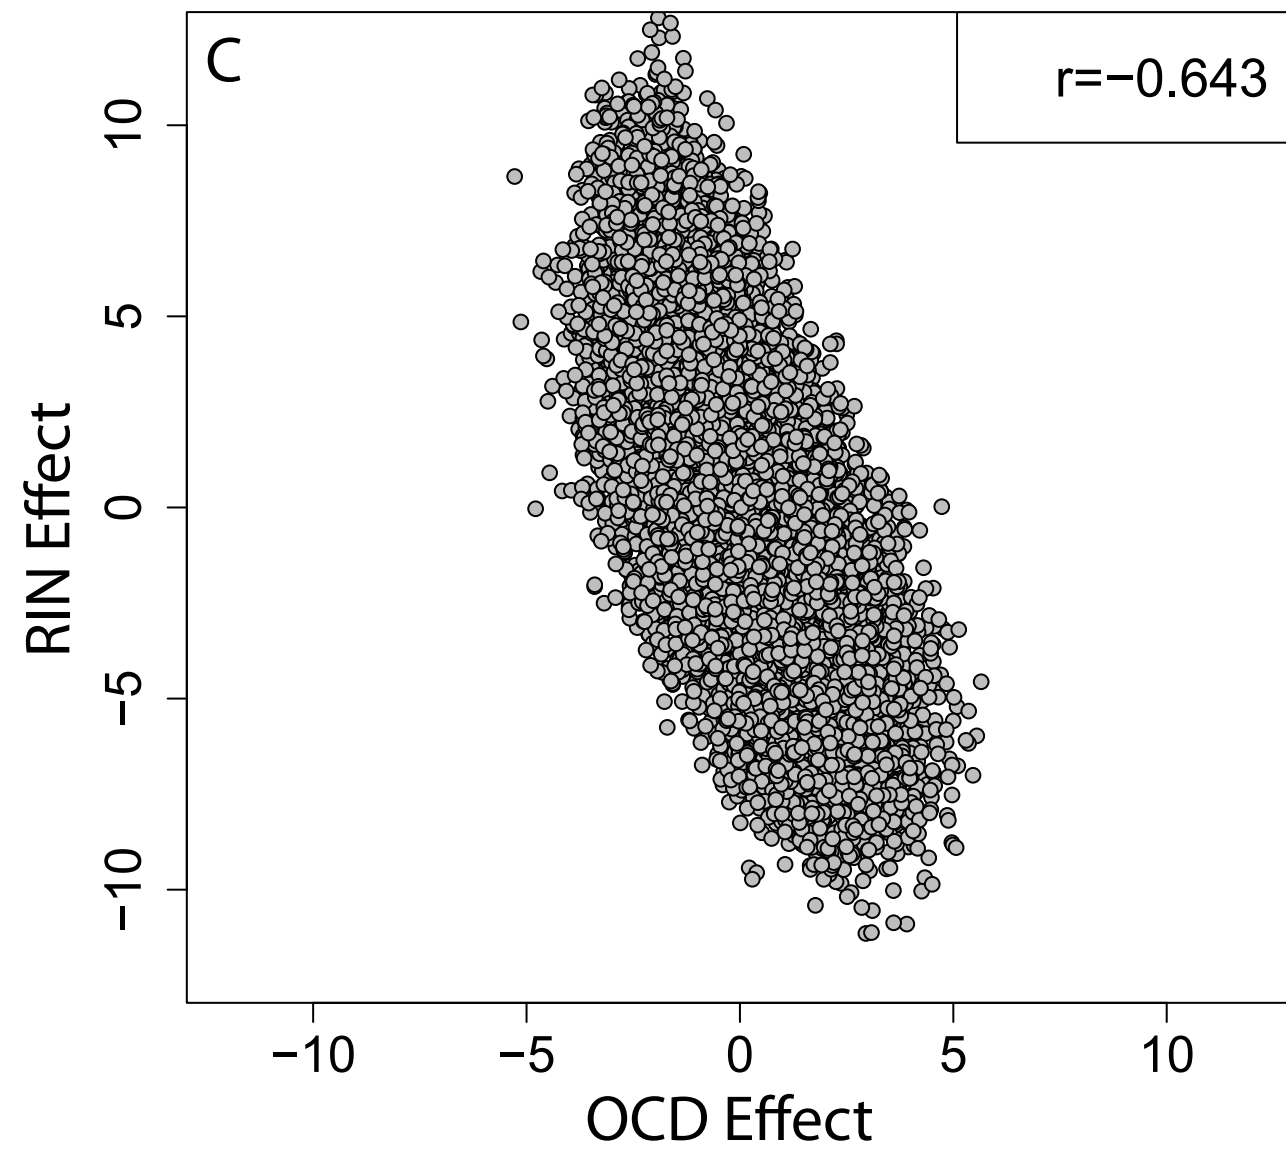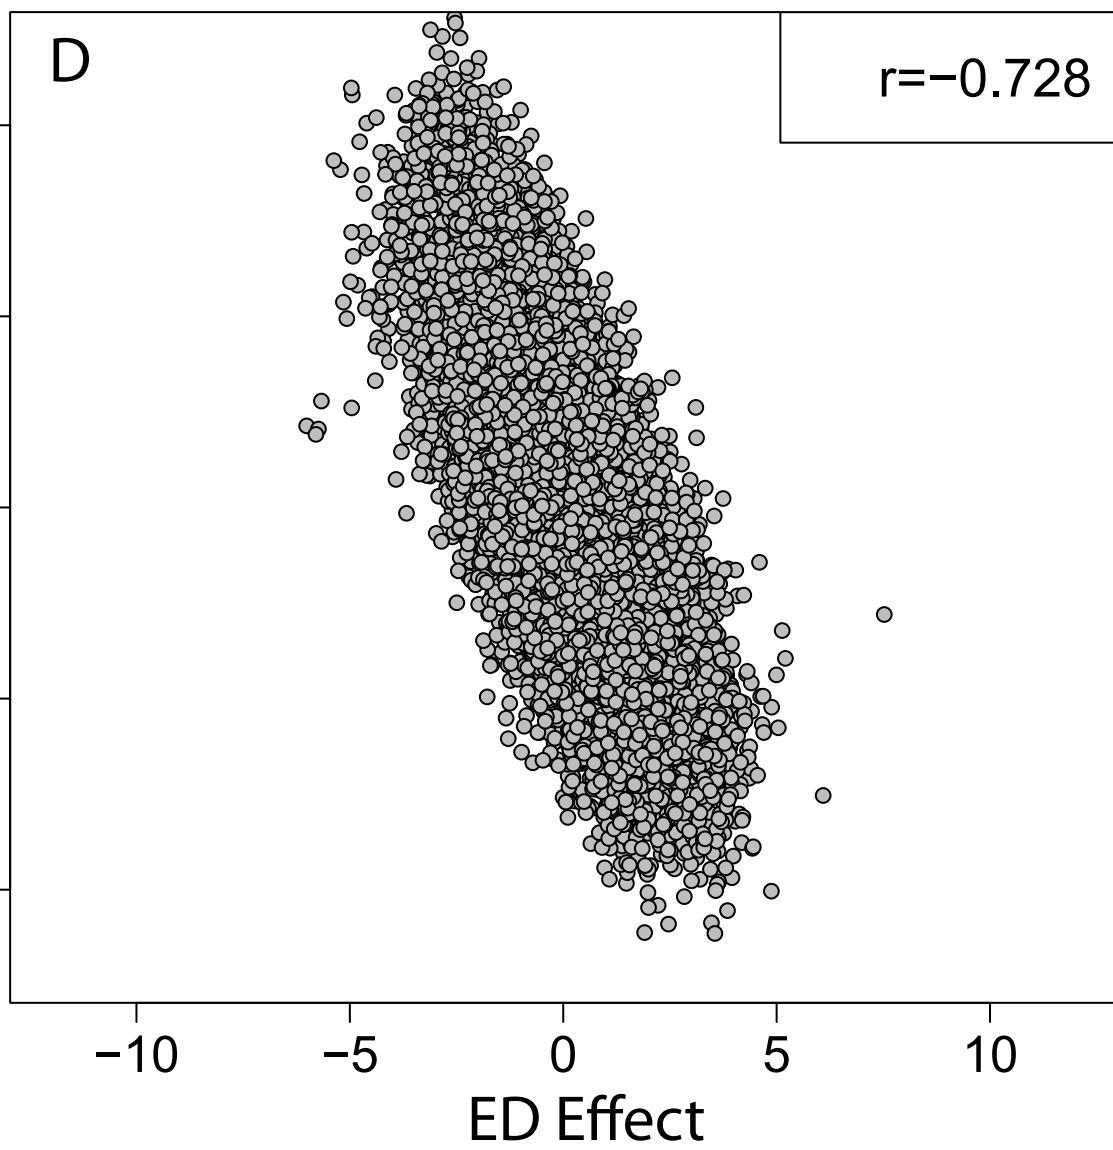

Supplement: tp201468x4.pdf [file tp201468x4.pdf]
